# Supplementary material for: Benefits of Sequentially Adding Cognitive-Behavioral Therapy or Antidepressant Medication for Adults With Nonremitting Depression
Source: Atypon-hosted journal article supplement (doi:10.1176/appi.ajp.2018.18091075), 2019-02-15

## ON-LINE DATA SUPPLEMENT

### Benefits of Sequentially Adding Cognitive Behavior Therapy or Antidepressant Medication in Non-remitting Depressed Adults

Boadie W. Dunlop, MD, Devon LoParo, PhD, Becky Kinkead, PhD, Tanja Mletzko-Crowe MA, Steven P. Cole, PhD, Charles B. Nemeroff, MD, PhD, Helen S. Mayberg, MD, W. Edward Craighead, PhD

#### Supplement Contents:

1. **Table S1.** Antidepressant medication exposure during Phase II Combination by treatment arm
2. **Table S2.** Antidepressant medication maintenance during 18-month long-term follow-up of Phase II completers who entered follow-up phase
3. **Table S3.** Predictors of Phase I or II Remission among completers (n=251)
4. **Figure S1.** CONSORT Diagram for Phase II Combination Treatment in PReDICT Study
5. **Figure S2.** CONSORT Diagram for 18-month Follow-up Phase in PReDICT Study

**Table S1.** Antidepressant medication exposure during Phase II Combination by treatment arm

|                                                                             | Phase II Combination Treatment Arm |        |           |        | p   |
|-----------------------------------------------------------------------------|------------------------------------|--------|-----------|--------|-----|
|                                                                             | CBT+MED                            |        | MED+CBT   |        |     |
| <b>Completers, n</b>                                                        | <b>31</b>                          |        | <b>66</b> |        |     |
| Stopped medication prior to Week 24, n (%)                                  | 2                                  | (6.5)  | 1         | (1.5)  | .19 |
| Days on medication from Phase II baseline to last Phase II visit, mean (SD) | 83.7                               | (16.3) | 86.6      | (13.0) | .35 |
| <b>Early Terminators, n</b>                                                 | <b>6</b>                           |        | <b>9</b>  |        |     |
| Stopped medication prior to termination visit, n (%)                        | 0                                  | (0)    | 0         | (0)    | --  |
| Days on medication from Phase II baseline to last Phase II visit, mean (SD) | 40.8                               | (21.3) | 39.8      | (23.7) | .93 |
| <b>All Phase II Patients, n</b>                                             | <b>37</b>                          |        | <b>75</b> |        |     |
| Stopped medication prior to Week 24, n (%)                                  | 2                                  | (5.4)  | 1         | (1.3)  | .21 |
| Days on medication from Phase II baseline to last Phase II visit, mean (SD) | 76.7                               | (23.5) | 81.0      | (21.0) | .34 |

CBT+MED: Cognitive behavior therapy in Phase I, with addition of escitalopram in Phase II

MED+CBT: Escitalopram or duloxetine in Phase I, with addition of cognitive behavior therapy in Phase II

**Table S2.** Antidepressant medication maintenance during 18-month long-term follow-up of Phase II completers who entered follow-up phase

|                                 | Stopped medication prior to last follow-up visit, n (%) | Days on medication from end of Phase II, mean $\pm$ SD | Days on medication from Phase II baseline, mean $\pm$ SD |
|---------------------------------|---------------------------------------------------------|--------------------------------------------------------|----------------------------------------------------------|
| CBT+MED (n= 26)                 | 8 (30.8%)                                               | 370 $\pm$ 218                                          | 457 $\pm$ 216                                            |
| MED+CBT (n= 53)                 | 13 (24.5%)                                              | 374 $\pm$ 189                                          | 462 $\pm$ 190                                            |
| p-value                         | .56                                                     | .93                                                    | .90                                                      |
| <b><u>MED+CBT subgroups</u></b> |                                                         |                                                        |                                                          |
| Escitalopram+CBT (n= 35)        | 9 (25.7%)                                               | 389 $\pm$ 184                                          | 479 $\pm$ 186                                            |
| Duloxetine+CBT (n= 18)          | 4 (22.2%)                                               | 345 $\pm$ 199                                          | 433 $\pm$ 197                                            |
| p-value                         | .78                                                     | .42                                                    | .41                                                      |

CBT+MED: Cognitive behavior therapy in Phase I, with addition of escitalopram in Phase II

MED+CBT: Escitalopram or duloxetine in Phase I, with addition of cognitive behavior therapy in Phase II

**Table S3.** Predictors of Phase I or II Remission among completers (n=251)

| Variable                   | Predictor effect    |    |        |
|----------------------------|---------------------|----|--------|
|                            | Wald X <sup>2</sup> | df | p      |
| Severity (HAM-D) at Week 1 | 6.437               | 1  | 0.011* |
| Chronic episode            | 0.308               | 1  | 0.579  |
| Age                        | 2.839               | 1  | 0.092  |
| Anxiety (HAM-A) at Week 1  | 11.112              | 1  | 0.001* |
| Current Anxiety Disorder   | 6.859               | 1  | 0.009* |
| Gender                     | 2.437               | 1  | 0.119  |
| Race                       | 0.579               | 3  | 0.901  |
| Married/cohabitating       | 1.878               | 1  | 0.171  |
| Employed full time         | 0.111               | 1  | 0.739  |

\* p<.05

Figure S1. CONSORT Diagram for Phase II Combination Treatment in PRedICT Study

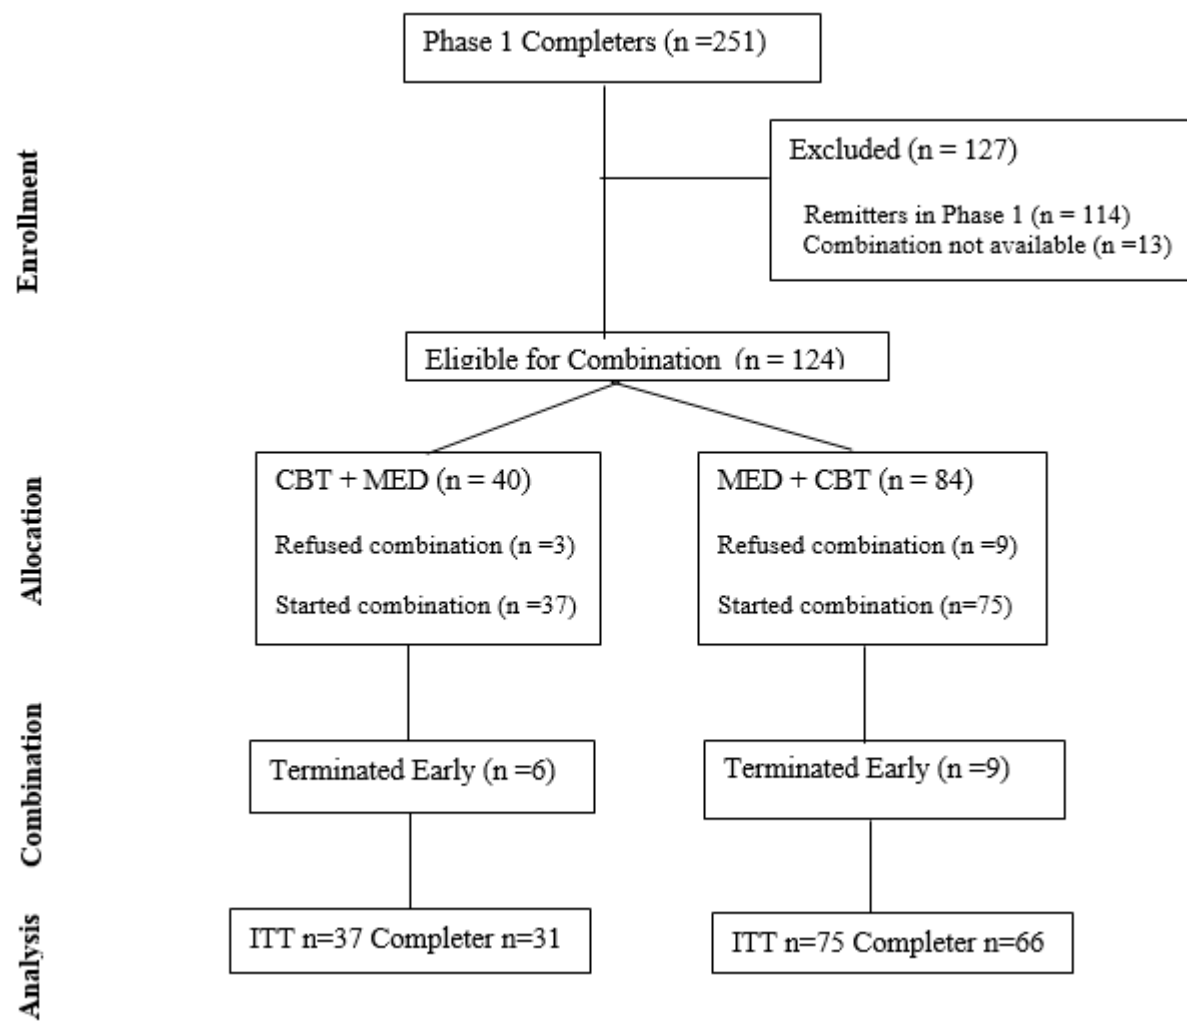

Figure S2. CONSORT Diagram for 18-month Follow-up Phase in PRedICT Study

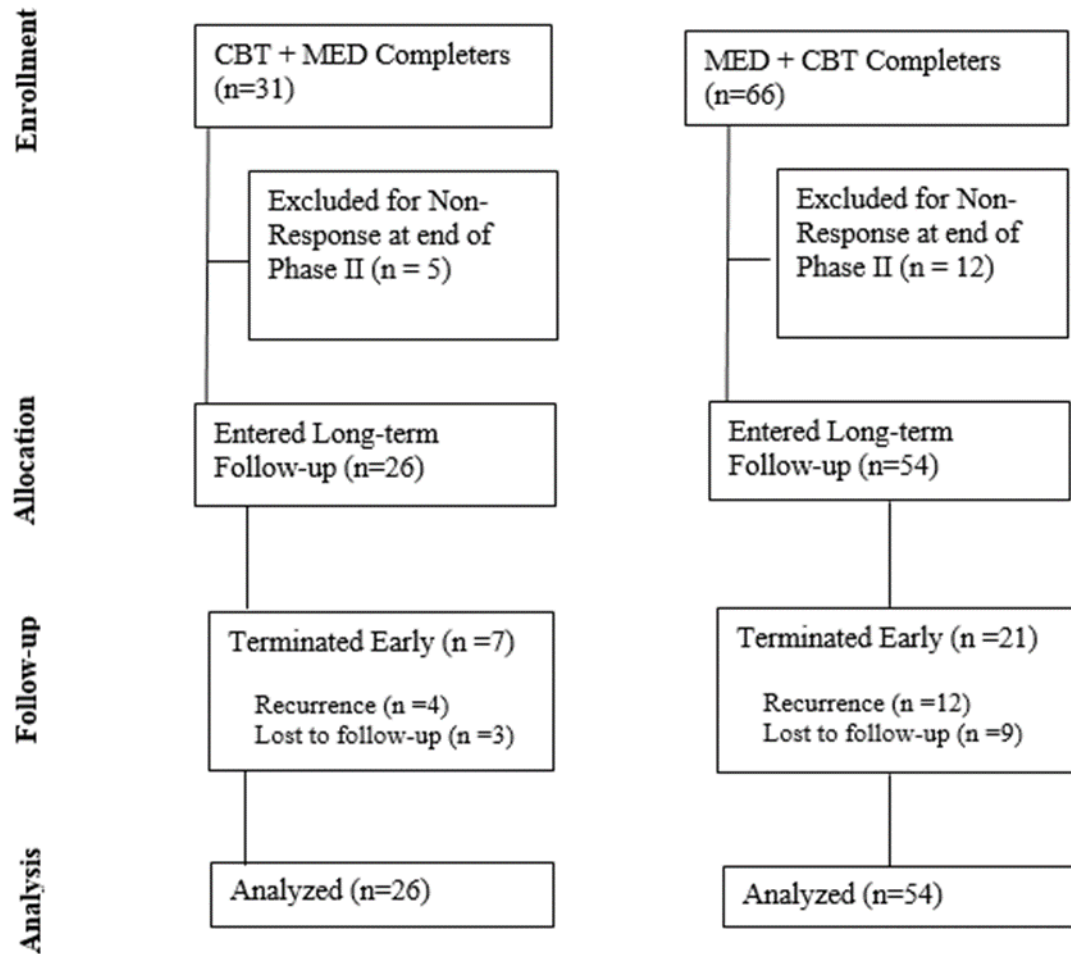

Supplement: appi.ajp.2018.18091075.ds001.pdf [file appi.ajp.2018.18091075.ds001.pdf]
